# Supplementary material
Source: publisher figshare collection journal article supplement (https://acs.figshare.com/ndownloader/files/14618279)
Supplement: Supplementary file 1 [file 14618279]

## **Supporting Information**

### **Enhancing Strength of Wool Fiber using Soy Flour Sugar-based ‘Green’ Crosslinker**

**Namrata V. Patil and Anil N. Netravali\***

Department of Fiber Science & Apparel Design

Cornell University, 37 Forest Home Dr., Ithaca, NY 14853, USA

### **Corresponding Author**

\* E-mail: [ann2@cornell.edu](mailto:ann2@cornell.edu)

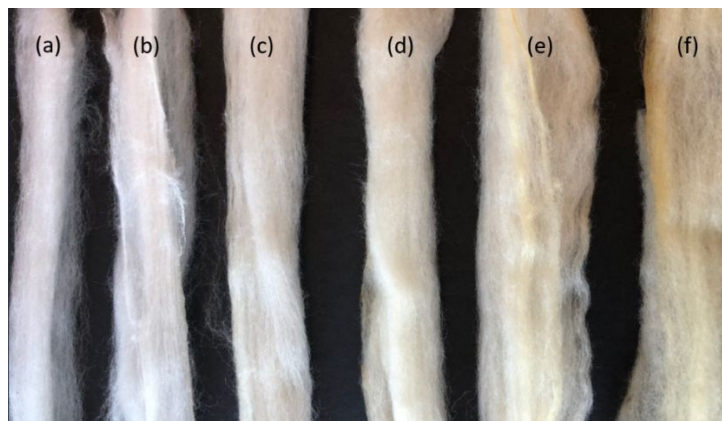

**Figure S1.** Pictures of control and treated wool slivers (a) control (b) wool-SFS (c) wool-OSFS MR 1, (d) wool-OSFS MR 1.5, (e) wool-OSFS MR 2, (f) wool-OSFS MR 2.5. All treatments carried out at 150°C for 20 min.

#### Optimization of $\text{NaIO}_4$ :SFS molar ratio.

Addition of oxidized soy flour sugars (OSFS) to soy flour (SF) shows an instantaneous color change due to Maillard reaction. Figure S1 shows the effect of addition of OSFS with different molar ratios of  $\text{NaIO}_4$ :SFS from 0.5 to 2.5 on the color of SF. As seen in Figure S1, the color of the SF changes from off-white to yellow-brown with the increase in the oxidation of soy flour sugars (SFS) from 0.5 to 2 after which it remains constant.  $\text{NaIO}_4$ :SF MR 2.5 showed maximum color change and thus was used to crosslink wool fibers. For the molar calculations, the molecular weight of SFS was assumed to be 342, which is the molecular weight of sucrose.

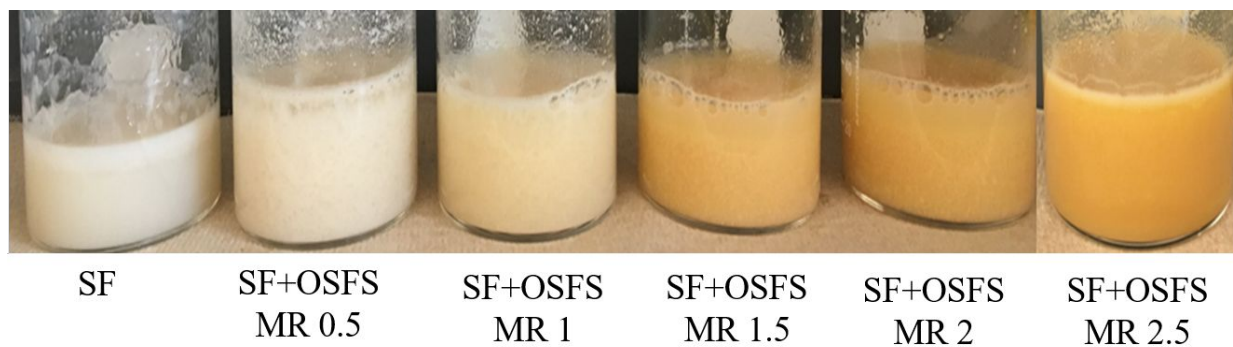

**Figure S2.** Effect of addition of OSFS with different molar ratios of  $\text{NaIO}_4$ :SFS from 0.5 to 2.5 on the color of SF.

### Optimization of $\text{BaCl}_2\text{:NaIO}_4$ molar ratio.

At the end of the oxidation of SFS, optimum amount of  $\text{BaCl}_2$  was added to curb the oxidation reaction. When  $\text{BaCl}_2$  is added to  $\text{NaIO}_3$ , they react to form barium iodate  $\text{Ba}(\text{IO}_3)_2$  which is insoluble in water at lower temperatures. The reaction mixture was refrigerated to precipitate  $\text{Ba}(\text{IO}_3)_2$ . Different molar ratios of  $\text{BaCl}_2\text{:NaIO}_4$  (0, 0.5, 1 and 1.5) were added to the reaction mixture and placed in the refrigerator for 1 h. As seen in Figure S3, the parafilm on the beaker without  $\text{BaCl}_2$  turns purple possibly due to the presence of free iodine fumes. With increase in the amount of  $\text{BaCl}_2$  and the time in refrigerator, the purple color on the parafilm reduced. At MR 1.5, no purple color (no free iodine fumes) was observed and OSFS turned clear, indicating formation of  $\text{Ba}(\text{IO}_3)_2$ . The OSFS was then filtered to obtain OSFS. Thus,  $\text{BaCl}_2\text{:NaIO}_4$  MR 1.5 was used to remove  $\text{NaIO}_3$  from the reaction mixture.

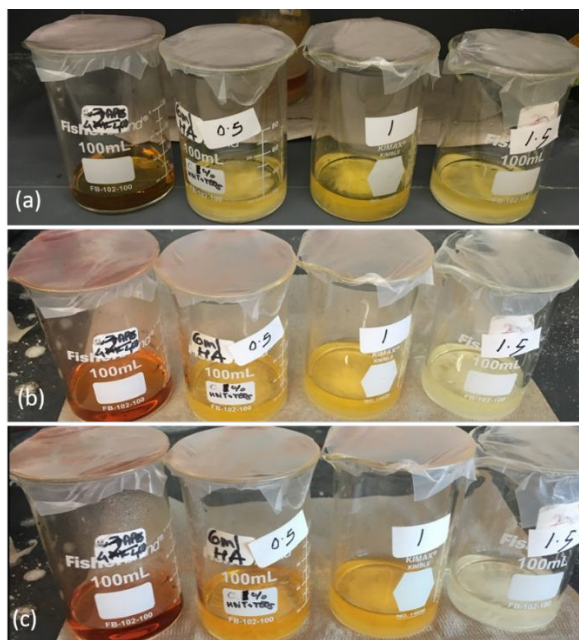

**Figure S3.**  $\text{BaCl}_2\text{:NaIO}_4$  molar ratios of 0, 0.5, 1 and 1.5 (across a, b and c) added to OSFS (a) 15 min refrigerated (b) 30 min refrigerated (c) 1 h refrigerated.
